# Supplementary material
Source: publisher figshare collection journal article supplement (https://acs.figshare.com/ndownloader/files/5700576)
Supplement: Supplementary file 1 [file 5700576]

 
data_acta 
 
_audit_creation_method            SHELXL-97 
_chemical_name_systematic 
; 
 ? 
; 
_chemical_name_common             ? 
_chemical_melting_point           ? 
_chemical_formula_moiety          ? 
_chemical_formula_sum 
 'C9 H18 Gd2 O18' 
_chemical_formula_weight          728.73 
 
loop_ 
 _atom_type_symbol 
 _atom_type_description 
 _atom_type_scat_dispersion_real 
 _atom_type_scat_dispersion_imag 
 _atom_type_scat_source 
 'C'  'C'   0.0033   0.0016 
 'International Tables Vol C Tables 4.2.6.8 and 6.1.1.4' 
 'H'  'H'   0.0000   0.0000 
 'International Tables Vol C Tables 4.2.6.8 and 6.1.1.4' 
 'O'  'O'   0.0106   0.0060 
 'International Tables Vol C Tables 4.2.6.8 and 6.1.1.4' 
 'Gd'  'Gd'  -0.1653   3.9035 
 'International Tables Vol C Tables 4.2.6.8 and 6.1.1.4' 
 
_symmetry_cell_setting            ? 
_symmetry_space_group_name_H-M    ? 
 
loop_ 
 _symmetry_equiv_pos_as_xyz 
 'x, y, z' 
 '-x+1/2, y, -z' 
 'x+1/2, y+1/2, z+1/2' 
 '-x+1, y+1/2, -z+1/2' 
 '-x, -y, -z' 
 'x-1/2, -y, z' 
 '-x+1/2, -y+1/2, -z+1/2' 
 'x, -y+1/2, z+1/2' 
 
_cell_length_a                    11.1064(10) 
_cell_length_b                    12.2524(10) 
_cell_length_c                    13.6098(10) 
_cell_angle_alpha                 90.00 
_cell_angle_beta                  92.925(10) 
_cell_angle_gamma                 90.00 
_cell_volume                      1849.6(3) 
_cell_formula_units_Z             4 
_cell_measurement_temperature     293(2) 
_cell_measurement_reflns_used     ? 
_cell_measurement_theta_min       ? 
_cell_measurement_theta_max       ? 
 
_exptl_crystal_description        ? 
_exptl_crystal_colour             ? 
_exptl_crystal_size_max           ? 
_exptl_crystal_size_mid           ? 
_exptl_crystal_size_min           ? 
_exptl_crystal_density_meas       ? 
_exptl_crystal_density_diffrn     2.617 
_exptl_crystal_density_method     'not measured' 
_exptl_crystal_F_000              1376 
_exptl_absorpt_coefficient_mu     7.201 
_exptl_absorpt_correction_type    ? 
_exptl_absorpt_correction_T_min   ? 
_exptl_absorpt_correction_T_max   ? 
_exptl_absorpt_process_details    ? 
 
_exptl_special_details 
; 
 ? 
; 
 
_diffrn_ambient_temperature       293(2) 
_diffrn_radiation_wavelength      0.71069 
_diffrn_radiation_type            MoK\a 
_diffrn_radiation_source          'fine-focus sealed tube' 
_diffrn_radiation_monochromator   graphite 
_diffrn_measurement_device_type   ? 
_diffrn_measurement_method        ? 
_diffrn_detector_area_resol_mean  ? 
_diffrn_standards_number          ? 
_diffrn_standards_interval_count  ? 
_diffrn_standards_interval_time   ? 
_diffrn_standards_decay_%         ? 
_diffrn_reflns_number             2800 
_diffrn_reflns_av_R_equivalents   0.0177 
_diffrn_reflns_av_sigmaI/netI     0.0209 
_diffrn_reflns_limit_h_min        -15 
_diffrn_reflns_limit_h_max        0 
_diffrn_reflns_limit_k_min        -3 
_diffrn_reflns_limit_k_max        17 
_diffrn_reflns_limit_l_min        -19 
_diffrn_reflns_limit_l_max        19 
_diffrn_reflns_theta_min          3.00 
_diffrn_reflns_theta_max          29.96 
_reflns_number_total              2637 
_reflns_number_gt                 2389 
_reflns_threshold_expression      >2sigma(I) 
 
_computing_data_collection        ? 
_computing_cell_refinement        ? 
_computing_data_reduction         ? 
_computing_structure_solution     'SHELXS-97 (Sheldrick, 1990)' 
_computing_structure_refinement   'SHELXL-97 (Sheldrick, 1997)' 
_computing_molecular_graphics     ? 
_computing_publication_material   ? 
 
_refine_special_details 
; 
 Refinement of F^2^ against ALL reflections.  The weighted R-factor wR and 
 goodness of fit S are based on F^2^, conventional R-factors R are based 
 on F, with F set to zero for negative F^2^. The threshold expression of 
 F^2^ > 2sigma(F^2^) is used only for calculating R-factors(gt) etc. and is 
 not relevant to the choice of reflections for refinement.  R-factors based 
 on F^2^ are statistically about twice as large as those based on F, and R- 
 factors based on ALL data will be even larger. 
; 
 
_refine_ls_structure_factor_coef  Fsqd  
_refine_ls_matrix_type            full 
_refine_ls_weighting_scheme       calc  
_refine_ls_weighting_details 
 'calc w=1/[\s^2^(Fo^2^)+(0.0330P)^2^+1.1052P] where P=(Fo^2^+2Fc^2^)/3' 
_atom_sites_solution_primary      direct 
_atom_sites_solution_secondary    difmap 
_atom_sites_solution_hydrogens    geom 
_refine_ls_hydrogen_treatment     mixed 
_refine_ls_extinction_method      SHELXL 
_refine_ls_extinction_coef        0.00160(11) 
_refine_ls_extinction_expression 
 'Fc^*^=kFc[1+0.001xFc^2^\l^3^/sin(2\q)]^-1/4^' 
_refine_ls_number_reflns          2637 
_refine_ls_number_parameters      161 
_refine_ls_number_restraints      0 
_refine_ls_R_factor_all           0.0251 
_refine_ls_R_factor_gt            0.0200 
_refine_ls_wR_factor_ref          0.0544 
_refine_ls_wR_factor_gt           0.0527 
_refine_ls_goodness_of_fit_ref    1.111 
_refine_ls_restrained_S_all       1.111 
_refine_ls_shift/su_max           0.058 
_refine_ls_shift/su_mean          0.004 
 
loop_ 
 _atom_site_label 
 _atom_site_type_symbol 
 _atom_site_fract_x 
 _atom_site_fract_y 
 _atom_site_fract_z 
 _atom_site_U_iso_or_equiv 
 _atom_site_adp_type 
 _atom_site_occupancy 
 _atom_site_symmetry_multiplicity 
 _atom_site_calc_flag 
 _atom_site_refinement_flags 
 _atom_site_disorder_assembly 
 _atom_site_disorder_group 
Gd1 Gd 0.403448(10) 0.351394(9) 0.283035(8) 0.01510(7) Uani 1 1 d . . . 
C2 C 0.6597(3) 0.1714(2) 0.3805(2) 0.0235(5) Uani 1 1 d . . . 
H1 H 0.740(6) 0.123(5) 0.388(5) 0.063(16) Uiso 1 1 d . . . 
H2 H 0.618(4) 0.180(3) 0.442(3) 0.030(9) Uiso 1 1 d . . . 
O2W O 0.5073(2) 0.3205(2) 0.12592(16) 0.0285(4) Uani 1 1 d . . . 
H21 H 0.452(5) 0.291(6) 0.066(5) 0.084(19) Uiso 1 1 d . . . 
H22 H 0.569(5) 0.270(4) 0.140(4) 0.055(13) Uiso 1 1 d . . . 
O2 O 0.48113(18) 0.16797(16) 0.27391(16) 0.0227(4) Uani 1 1 d . . . 
O3 O 0.6088(2) 0.35562(14) 0.33415(18) 0.0257(4) Uani 1 1 d . . . 
O5 O 0.38987(18) 0.25866(18) 0.44831(14) 0.0253(4) Uani 1 1 d . . . 
O4 O 0.79952(19) 0.31653(19) 0.3714(2) 0.0327(5) Uani 1 1 d . . . 
O1W O 0.2100(2) 0.4356(2) 0.3195(2) 0.0375(6) Uani 1 1 d . . . 
H11 H 0.145(5) 0.413(4) 0.292(3) 0.038(11) Uiso 1 1 d . . . 
H12 H 0.172(9) 0.499(11) 0.301(9) 0.16(4) Uiso 1 1 d . . . 
O3W O 0.4258(3) 0.4946(2) 0.4130(2) 0.0480(7) Uani 1 1 d . . . 
C1 C 0.5679(2) 0.1154(2) 0.31172(18) 0.0181(4) Uani 1 1 d . . . 
C3 C 0.6914(2) 0.2889(2) 0.35993(19) 0.0192(4) Uani 1 1 d . . . 
C5 C 0.2500 0.1251(3) 0.5000 0.0202(6) Uani 1 2 d S . . 
H5 H 0.168(6) 0.098(6) 0.471(5) 0.079(18) Uiso 1 1 d . . . 
C4 C 0.2998(2) 0.2011(2) 0.42438(17) 0.0170(4) Uani 1 1 d . . . 
O1 O 0.5838(2) 0.01537(17) 0.29926(19) 0.0337(5) Uani 1 1 d . . . 
O6 O 0.24804(17) 0.20923(16) 0.33964(13) 0.0204(3) Uani 1 1 d . . . 
 
loop_ 
 _atom_site_aniso_label 
 _atom_site_aniso_U_11 
 _atom_site_aniso_U_22 
 _atom_site_aniso_U_33 
 _atom_site_aniso_U_23 
 _atom_site_aniso_U_13 
 _atom_site_aniso_U_12 
Gd1 0.01503(8) 0.01469(8) 0.01558(9) 0.00037(3) 0.00073(5) -0.00005(3) 
C2 0.0205(12) 0.0186(11) 0.0309(14) 0.0034(10) -0.0040(10) 0.0002(10) 
O2W 0.0254(10) 0.0382(11) 0.0223(10) 0.0012(9) 0.0050(8) 0.0097(9) 
O2 0.0188(9) 0.0205(8) 0.0285(10) -0.0050(7) 0.0001(7) 0.0007(7) 
O3 0.0205(10) 0.0160(9) 0.0401(13) 0.0010(7) -0.0035(9) 0.0001(6) 
O5 0.0246(8) 0.0339(10) 0.0175(8) 0.0009(7) 0.0010(7) -0.0073(8) 
O4 0.0189(9) 0.0268(10) 0.0520(14) 0.0022(10) -0.0012(9) -0.0021(8) 
O1W 0.0231(10) 0.0256(11) 0.0633(16) -0.0145(10) -0.0041(10) 0.0050(8) 
O3W 0.0591(16) 0.0358(13) 0.0462(15) -0.0168(11) -0.0268(13) 0.0189(12) 
C1 0.0190(11) 0.0171(10) 0.0189(11) -0.0012(8) 0.0065(8) -0.0013(8) 
C3 0.0175(10) 0.0209(11) 0.0194(11) -0.0022(9) 0.0019(8) 0.0004(8) 
C5 0.0257(17) 0.0223(15) 0.0130(14) 0.000 0.0059(13) 0.000 
C4 0.0187(10) 0.0211(11) 0.0115(9) -0.0013(8) 0.0036(8) 0.0017(8) 
O1 0.0428(13) 0.0172(9) 0.0410(13) -0.0052(8) 0.0000(10) 0.0029(8) 
O6 0.0211(8) 0.0289(9) 0.0113(7) 0.0016(7) 0.0019(6) -0.0005(7) 
 
_geom_special_details 
; 
 All esds (except the esd in the dihedral angle between two l.s. planes) 
 are estimated using the full covariance matrix.  The cell esds are taken 
 into account individually in the estimation of esds in distances, angles 
 and torsion angles; correlations between esds in cell parameters are only 
 used when they are defined by crystal symmetry.  An approximate (isotropic) 
 treatment of cell esds is used for estimating esds involving l.s. planes. 
; 
 
loop_ 
 _geom_bond_atom_site_label_1 
 _geom_bond_atom_site_label_2 
 _geom_bond_distance 
 _geom_bond_site_symmetry_2 
 _geom_bond_publ_flag 
Gd1 O1 2.308(2) 4 ? 
Gd1 O3 2.351(2) . ? 
Gd1 O2 2.413(2) . ? 
Gd1 O6 2.4255(18) 7 ? 
Gd1 O1W 2.456(2) . ? 
Gd1 O3W 2.494(2) . ? 
Gd1 O2W 2.509(2) . ? 
Gd1 O5 2.5314(19) . ? 
Gd1 O6 2.5966(19) . ? 
Gd1 C4 2.940(2) . ? 
C2 C3 1.512(4) . ? 
C2 C1 1.513(4) . ? 
C2 H1 1.07(6) . ? 
C2 H2 0.98(4) . ? 
O2W H21 1.06(7) . ? 
O2W H22 0.94(5) . ? 
O2 C1 1.248(3) . ? 
O3 C3 1.265(3) . ? 
O5 C4 1.253(3) . ? 
O4 C3 1.250(3) . ? 
O1W H11 0.85(5) . ? 
O1W H12 0.91(12) . ? 
C1 O1 1.251(3) . ? 
C5 C4 1.513(3) 2_556 ? 
C5 C4 1.513(3) . ? 
C5 H5 1.03(7) . ? 
C4 O6 1.266(3) . ? 
O1 Gd1 2.308(2) 4_545 ? 
O6 Gd1 2.4255(18) 7 ? 
 
loop_ 
 _geom_angle_atom_site_label_1 
 _geom_angle_atom_site_label_2 
 _geom_angle_atom_site_label_3 
 _geom_angle 
 _geom_angle_site_symmetry_1 
 _geom_angle_site_symmetry_3 
 _geom_angle_publ_flag 
O1 Gd1 O3 92.40(8) 4 . ? 
O1 Gd1 O2 139.02(8) 4 . ? 
O3 Gd1 O2 72.04(6) . . ? 
O1 Gd1 O6 89.43(8) 4 7 ? 
O3 Gd1 O6 147.02(7) . 7 ? 
O2 Gd1 O6 85.22(7) . 7 ? 
O1 Gd1 O1W 78.95(9) 4 . ? 
O3 Gd1 O1W 140.92(8) . . ? 
O2 Gd1 O1W 136.07(8) . . ? 
O6 Gd1 O1W 71.61(8) 7 . ? 
O1 Gd1 O3W 74.07(9) 4 . ? 
O3 Gd1 O3W 73.43(8) . . ? 
O2 Gd1 O3W 131.97(8) . . ? 
O6 Gd1 O3W 138.05(8) 7 . ? 
O1W Gd1 O3W 67.53(9) . . ? 
O1 Gd1 O2W 71.08(8) 4 . ? 
O3 Gd1 O2W 76.97(8) . . ? 
O2 Gd1 O2W 68.56(8) . . ? 
O6 Gd1 O2W 72.54(7) 7 . ? 
O1W Gd1 O2W 132.85(9) . . ? 
O3W Gd1 O2W 132.61(10) . . ? 
O1 Gd1 O5 146.08(8) 4 . ? 
O3 Gd1 O5 81.25(7) . . ? 
O2 Gd1 O5 70.45(7) . . ? 
O6 Gd1 O5 113.80(6) 7 . ? 
O1W Gd1 O5 85.22(9) . . ? 
O3W Gd1 O5 72.18(9) . . ? 
O2W Gd1 O5 137.75(7) . . ? 
O1 Gd1 O6 141.81(7) 4 . ? 
O3 Gd1 O6 125.21(6) . . ? 
O2 Gd1 O6 68.61(7) . . ? 
O6 Gd1 O6 63.29(7) 7 . ? 
O1W Gd1 O6 67.69(8) . . ? 
O3W Gd1 O6 107.76(9) . . ? 
O2W Gd1 O6 119.52(7) . . ? 
O5 Gd1 O6 50.55(6) . . ? 
O1 Gd1 C4 153.97(8) 4 . ? 
O3 Gd1 C4 103.09(7) . . ? 
O2 Gd1 C4 66.61(7) . . ? 
O6 Gd1 C4 88.71(7) 7 . ? 
O1W Gd1 C4 75.84(8) . . ? 
O3W Gd1 C4 90.28(9) . . ? 
O2W Gd1 C4 132.47(7) . . ? 
O5 Gd1 C4 25.09(6) . . ? 
O6 Gd1 C4 25.48(6) . . ? 
C3 C2 C1 118.2(2) . . ? 
C3 C2 H1 110(3) . . ? 
C1 C2 H1 110(3) . . ? 
C3 C2 H2 101(2) . . ? 
C1 C2 H2 104(2) . . ? 
H1 C2 H2 114(4) . . ? 
Gd1 O2W H21 116(3) . . ? 
Gd1 O2W H22 107(3) . . ? 
H21 O2W H22 109(5) . . ? 
C1 O2 Gd1 136.89(17) . . ? 
C3 O3 Gd1 138.31(17) . . ? 
C4 O5 Gd1 96.01(15) . . ? 
Gd1 O1W H11 121(3) . . ? 
Gd1 O1W H12 135(6) . . ? 
H11 O1W H12 77(7) . . ? 
O2 C1 O1 124.1(3) . . ? 
O2 C1 C2 120.2(2) . . ? 
O1 C1 C2 115.6(2) . . ? 
O4 C3 O3 122.6(3) . . ? 
O4 C3 C2 117.8(2) . . ? 
O3 C3 C2 119.6(2) . . ? 
C4 C5 C4 104.1(3) 2_556 . ? 
C4 C5 H5 96(4) 2_556 . ? 
C4 C5 H5 106(4) . . ? 
O5 C4 O6 120.8(2) . . ? 
O5 C4 C5 119.0(2) . . ? 
O6 C4 C5 120.2(2) . . ? 
O5 C4 Gd1 58.90(13) . . ? 
O6 C4 Gd1 61.92(13) . . ? 
C5 C4 Gd1 177.85(15) . . ? 
C1 O1 Gd1 158.6(2) . 4_545 ? 
C4 O6 Gd1 150.42(17) . 7 ? 
C4 O6 Gd1 92.60(15) . . ? 
Gd1 O6 Gd1 116.71(7) 7 . ? 
 
_diffrn_measured_fraction_theta_max    0.977 
_diffrn_reflns_theta_full              29.96 
_diffrn_measured_fraction_theta_full   0.977 
_refine_diff_density_max    1.219 
_refine_diff_density_min   -0.833 
_refine_diff_density_rms    0.151 
